# Supplementary material for: Isolating metallophthalocyanine sites into graphene-supported microporous polyaniline enables highly efficient sensing of ammonia
Source: Royal Society of Chemistry journal article supplement (doi:10.1039/d0ta10451e), 2021-01-01
Supplement: d0ta10451e1.pdf [file d0ta10451e1.pdf]

Supplementary Information

Isolating metallophthalocyanine sites into graphene-supported  
microporous polyaniline enables highly efficient sensing of  
ammonia

Xiaodong Lu,<sup>a</sup> Zhimin Chen,<sup>\*a</sup> Hao Wu,<sup>a</sup> Erping Cao,<sup>a</sup> Ying Wang,<sup>a</sup> Shichao Du,<sup>a</sup>  
Yiqun Wu<sup>\*ab</sup> and Zhiyu Ren<sup>a</sup>

<sup>a</sup>Key Laboratory of Functional Inorganic Material Chemistry (Ministry of Education of China), School of Chemistry and Materials Science, Heilongjiang University, 74# Xuefu Road, Nangang District, Harbin 150080, People's Republic of China

<sup>b</sup>Shanghai Institutes of Optics and Fine Mechanics, Chinese Academy of Sciences, 390# Qinghe Road, Jiading District, Shanghai 201800, People's Republic of China

\*Corresponding author E-mail: zmchen@hlju.edu.cn; yqwu@siom.ac.cn

Tel.: (+86) 451 8660 4331

Fax.: (+86) 451 8660 8616

## Table of contents

|                                       |    |
|---------------------------------------|----|
| <b>1. Experimental Section</b> .....  | 3  |
| <i>Scheme S1</i> .....                | 3  |
| <b>2. Supplementary Figures</b> ..... | 6  |
| <i>Fig. S1</i> .....                  | 6  |
| <i>Fig. S2</i> .....                  | 6  |
| <i>Fig. S3</i> .....                  | 7  |
| <i>Fig. S4</i> .....                  | 7  |
| <i>Fig. S5</i> .....                  | 8  |
| <i>Fig. S6</i> .....                  | 8  |
| <i>Fig. S7</i> .....                  | 9  |
| <i>Fig. S8</i> .....                  | 9  |
| <i>Fig. S9</i> .....                  | 10 |
| <i>Fig. S10</i> .....                 | 11 |
| <i>Fig. S11</i> .....                 | 12 |
| <i>Fig. S12</i> .....                 | 12 |
| <i>Fig. S13</i> .....                 | 13 |
| <i>Fig. S14</i> .....                 | 13 |
| <b>3. Supplementary Tables</b> .....  | 14 |
| <i>Table S1</i> .....                 | 14 |
| <i>Table S2</i> .....                 | 14 |
| <i>Table S3</i> .....                 | 15 |
| <i>Table S4</i> .....                 | 15 |
| <i>Table S5</i> .....                 | 16 |
| <i>Table S6</i> .....                 | 19 |

## 1. Experimental Section

### 1.1. Synthetical of tetra- $\beta$ -sulphthalocyanine cobalt

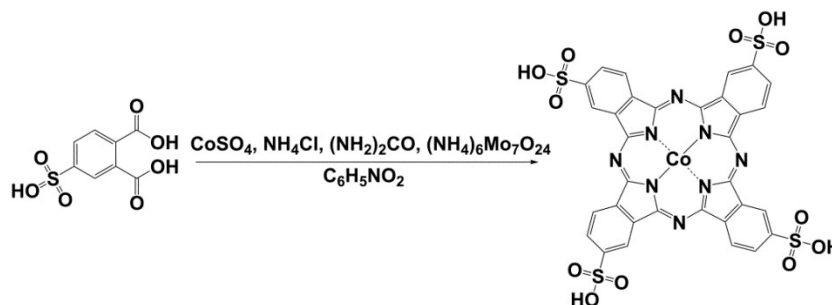

**Scheme S1** Synthetical scheme of tetra- $\beta$ -sulphthalocyanine cobalt(II).

The synthetic scheme of tetra- $\beta$ -sulphthalocyanine cobalt(II) (CoTsPc) is shown in **Scheme S1**.<sup>S1,S2</sup> Briefly, 4-sulphthalic acid (4.32 g, 16.2 mmol), ammonium chloride (0.47 g, 9.0 mmol), urea (5.8 g, 97 mmol), ammonium molybdate tetrahydrate (0.068 g, 0.06 mmol), and anhydrous cobalt(II) sulfate (1.36 g, 4.8 mmol) were taken into a solution of freshly distilled nitrobenzene (100 mL) at room temperature. Then, the mixture was stirred for 6 h in oil bath at 180 °C. After natural cooling to about 25 °C, the precipitate was filtered, washed with methanol and hydrochloric acid (1 mol L<sup>-1</sup>) saturated with sodium chloride, and then dissolved in a solution of sodium hydroxide (0.1 mol L<sup>-1</sup>, 200 mL). Subsequently, the above solution was heated to 80 °C and insoluble impurities were immediately separated by filtration. Then, the filtrate was acidified by addition of hydrochloric acid (0.1 mol L<sup>-1</sup>, 200 mL) with stirring, and left to stand overnight. Finally, the resulting precipitate was collected by centrifugation, washed with 80 % aqueous ethanol and then dried in a vacuum oven at 80 °C to obtain blue-black crystals of CoTsPc. Yield: 81 %. UV-vis spectra in DMF:  $\lambda_{\text{max}}$  (nm) = 665, 618. FTIR spectra (KBr pellets)  $\nu$ : 3390, 1637, 1618, 1456, 1396, 1193, 1143, 1108, 1028, 931 and 634 cm<sup>-1</sup>.

### 1.2. Calibration of gas concentration

The concentration of tested NH<sub>3</sub> gas is obtained by static volumetric capacity method. A series of commercially available standard gases with different concentrations and high purity ammonia act as the original gases, and the gases with target concentrations is obtained by diluting the desired volume of standards gas with air. The concentrations of tested gas were calculated using Eq. (1):

$$C_1V_1=C_2V_2 \quad (1)$$

where  $C_1$  is the concentration of standard gas (ppm),  $V_1$  is the volume of standard gas injected into the test chamber (mL),  $C_2$  is the concentration of tested gas (ppm), and  $V_2$  is the volume of test chamber (mL). Concentrations of standard gases and tested  $\text{NH}_3$  were periodically calibrated by indophenol blue spectrophotometric method.

### 1.3. Detection limit calculation

Theoretical detection limits of devices were calculated by established procedure.<sup>S3,S4</sup> Briefly, the sensor noise was calculated using the variation in the relative sensor response in the baseline using the root-mean-square (RMS) deviation. We replotted 600 data points at the baseline before the  $\text{NH}_3$  exposure. The points were averaged and a standard deviation (S). We then used Eq. (2) to calculate the  $RMS_{\text{noise}}$  of the sensors.

$$RMS_{\text{noise}} = \sqrt{\frac{S^2}{N}} \quad (2)$$

where N is the number of data points. According to the IUPAC definition,<sup>S5</sup> where the signal-to-noise ratio is 3. According to Figure 3C, the slope of the linear regression fit on the sensor response ( $\Delta R/R_0$ ) vs gas concentration plot. We then used Eq. (3) to calculate the detection limit of the sensors.

$$\text{Detection limit}_{\text{ppm}} = 3 \frac{RMS_{\text{noise}}}{\text{slope}} \quad (3)$$

Therefore, the theoretical  $\text{NH}_3$  detection limit of the obtained RGO@PANI-CoTsPc-2 sensor was estimated to be 14 ppb.

### 1.4. Resistance of sensor device.

The resistance of the sensors device was measured with a CUST•G2 gas sensing test system (Advanced Sensor Technology Laboratory of Jilin University, China) recording the change in resistance passing through the sensor at a 1-s interval by a computer.

## References:

- S1. J. K. Joseph, S. L. Jain and B. Sain, *Ind. Eng. Chem. Res.*, 2010, **49**, 6674–6677.
- S2. D. W. Scott, D. L. Myers, H. Hill and O. Omadoko, *Fuel*, 2019, **242**, 573–579.
- S3. K. A. Mirica, J. G. Weis, J. M. Schnorr, B. Esser and T. M. Swager, *Angew. Chem. Int. Edit.*, 2012, **51**, 10740-

10745.

**S4.** V. Dua, S. P. Surwade, S. Ammu, S. R. Agnihotra, S. Jain, K. E. Roberts, S. Park, R. S. Ruoff and S. K. Manohar, *Angew. Chem. Int. Edit.*, 2010, **49**, 2154-2157.

**S5.** J. Li, Y. J. Lu, Q. Ye, M. Cinke, J. Han and M. Meyyappan, *Nano Lett.*, 2003, **3**, 929-933.

## 2. Supplementary Figures

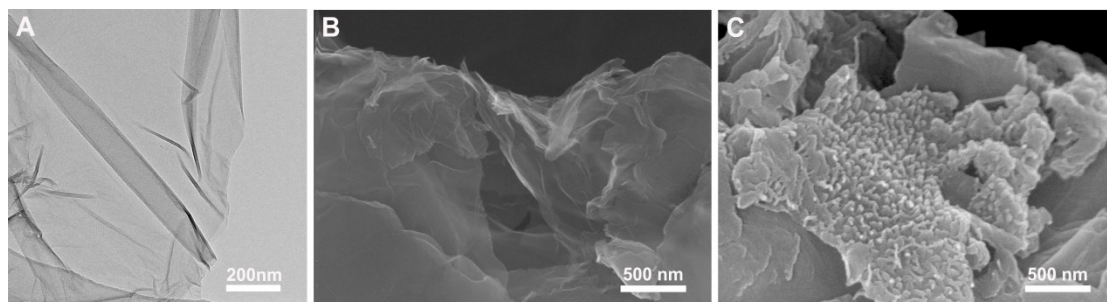

**Fig. S1** TEM and SEM images of GO (A-B), SEM images of GO/CoTsPc (C).

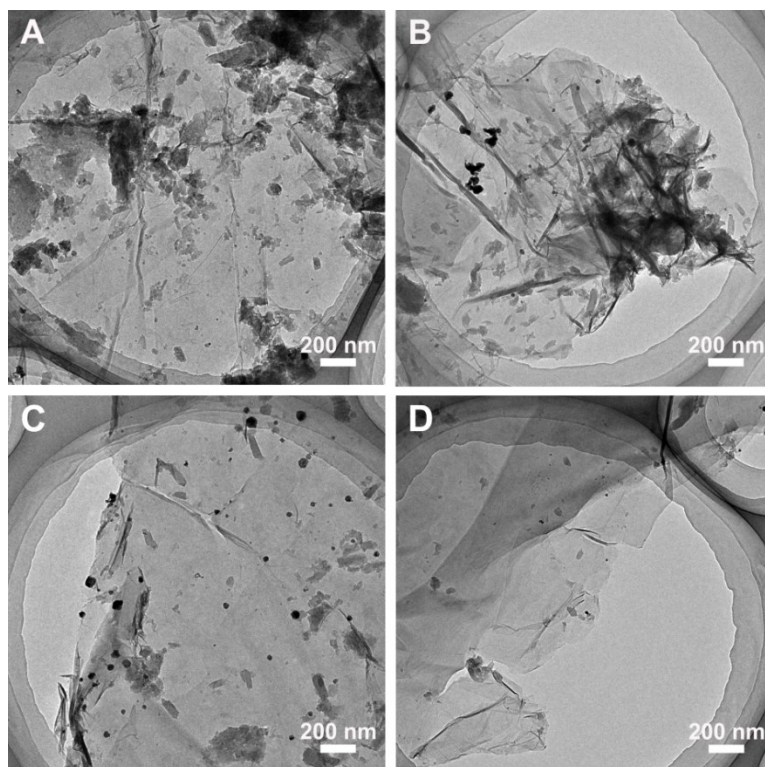

**Fig. S2** TEM images of GO/CoTsPc/An samples prepared by changing the amount of An. The amount of An in (A–D) is 0, 27, 54 and 81  $\mu\text{L}$ .

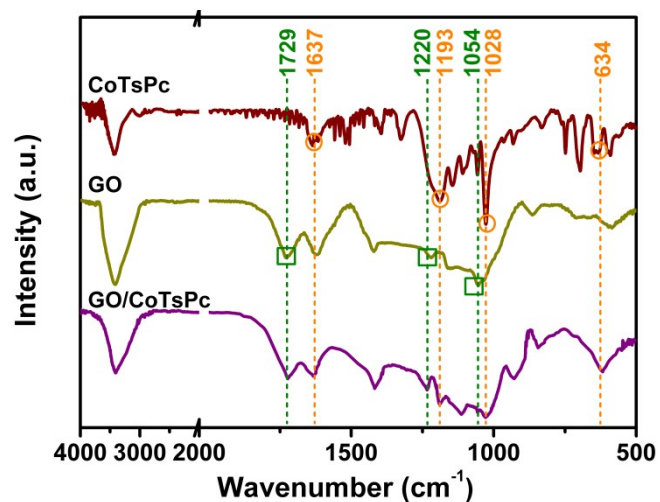

**Fig. S3** FTIR spectra of CoTsPc, GO and GO/CoTsPc.

As shown in **Fig. S3**, besides the typical vibrations of CoTsPc (1637, 1193, 1028 and 634  $\text{cm}^{-1}$  assigned to C–C, S–O of  $\text{SO}_3^-$ , S=O and S–C), the typical bands of carbonyl and carboxyl groups (1729, 1220 and 1054  $\text{cm}^{-1}$  assigned to C=O, C–OH, C–O) of GO are observed in the FTIR spectrum of the GO/CoTsPc hybrid, demonstrating the successful preparation of GO/CoTsPc. It is noteworthy that the slight shift in these peaks is due to electron delocalization of  $\pi$ - $\pi$  interactions between GO and CoTsPc.

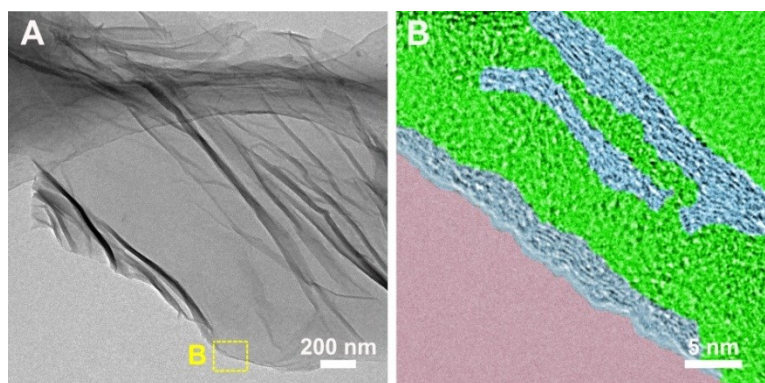

**Fig. S4** TEM (A) and HRTEM (B) images of RGO@PANI-CoTsPc-2.

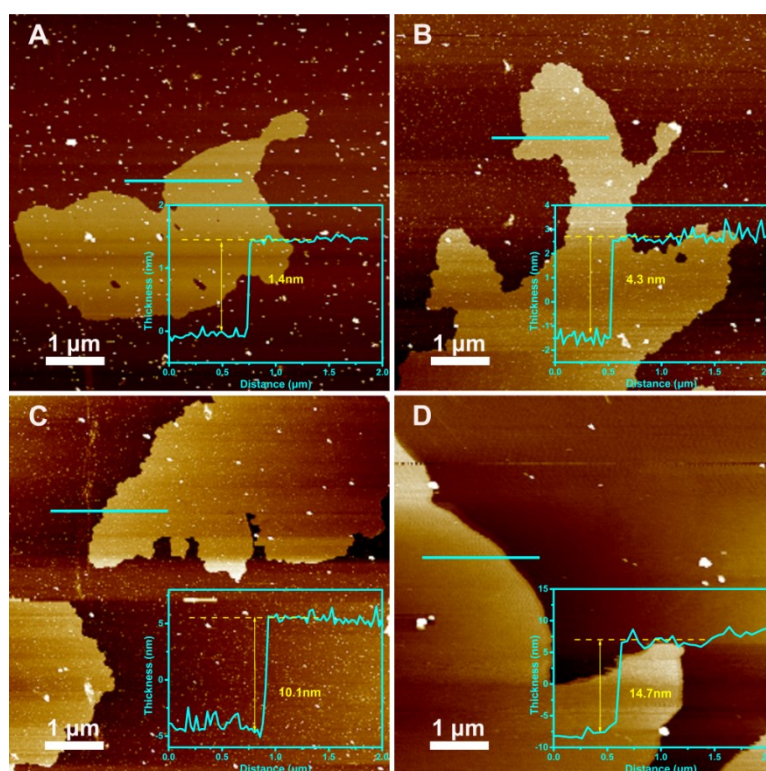

**Fig. S5** Tapping-mode AFM topographic images and height profiles of GO (A), RGO@PANI-CoTsPc-1 (B), RGO@PANI-CoTsPc-2 (C) and RGO@PANI-CoTsPc-3 (D).

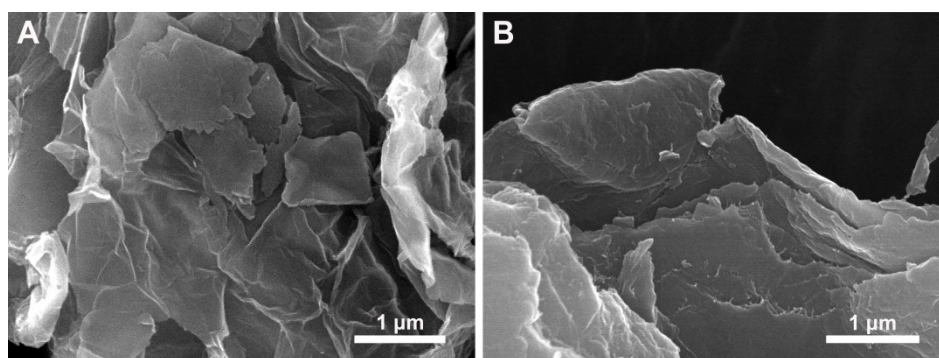

**Fig. S6** SEM images of RGO@PANI-CoTsPc-1 (A) and RGO@PANI-CoTsPc-3 (B).



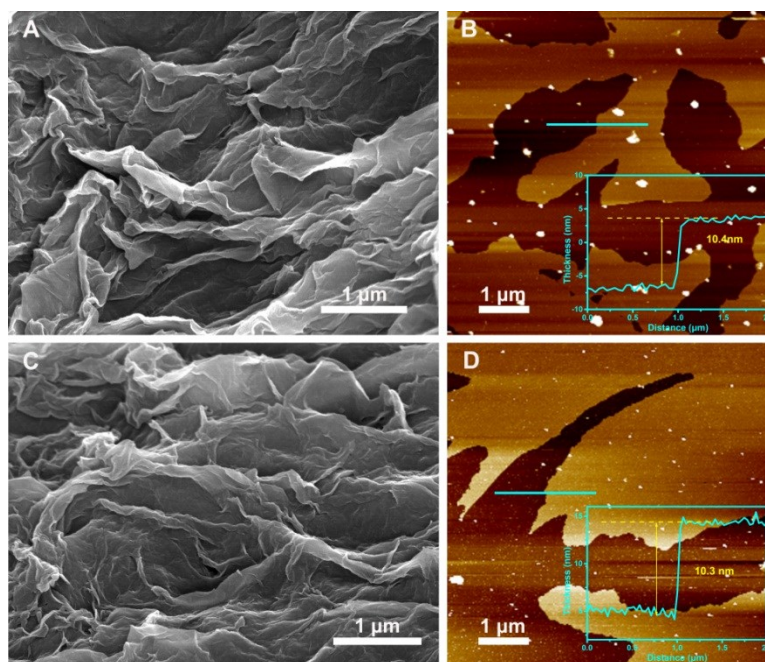

**Fig. S7** SEM images, tapping-mode AFM topographic images and height profiles of RGO@PANI-0.5CoTsPc (A-B) and RGO@PANI-1.5CoTsPc (C-D).

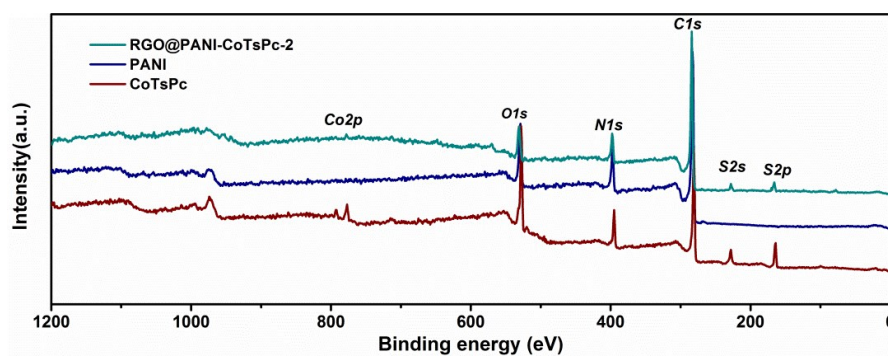

**Fig. S8** XPS spectra of CoTsPc, PANI, and RGO@PANI-CoTsPc-2.

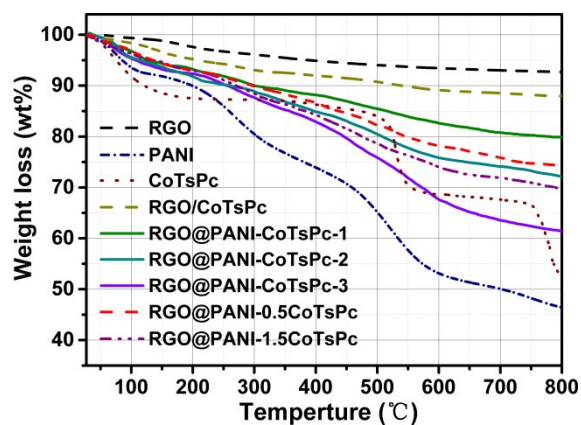

**Fig. S9** TGA curves of RGO, PANI, CoTsPc, RGO/CoTsPc, RGO@PANI-CoTsPc-1, RGO@PANI-CoTsPc-2, RGO@PANI-CoTsPc-3, RGO@PANI-0.5CoTsPc and RGO@PANI-1.5CoTsPc measured under a N<sub>2</sub> atmosphere.

The weigh percent of CoTsPc assembled on RGO has been evaluated by TG analysis under N<sub>2</sub> atmosphere. As shown in **Fig. S9**, TGA curve of CoTsPc presents a great loss of weight about 18.53 % from 300 to 600 °C sharply, indicating the thermal decomposition of peripheral –SO<sub>3</sub>H groups in N<sub>2</sub> atmosphere. However, at the same temperature range, the weight loss of RGO/CoTsPc is about 3.97 %; and only a minor weight loss averaging 2.68 % for RGO. Taking into account the weight loss of RGO, a corrected weight loss of 1.29 % can be estimated, which comes from CoTsPc in RGO/CoTsPc. However, the actual amount of CoTsPc adsorbed on the surface of RGO should consider the weight loss of CoTsPc itself. So, a real ratio of 6.96 % (1.29/18.53 %) can be calculated. Using the same calculation method, the weigh percent of PANI in RGO@PANI-CoTsPc hybrids are also evaluated by TG analysis under N<sub>2</sub> atmosphere (**Fig. S9**), and the results are shown in **Table S3**.

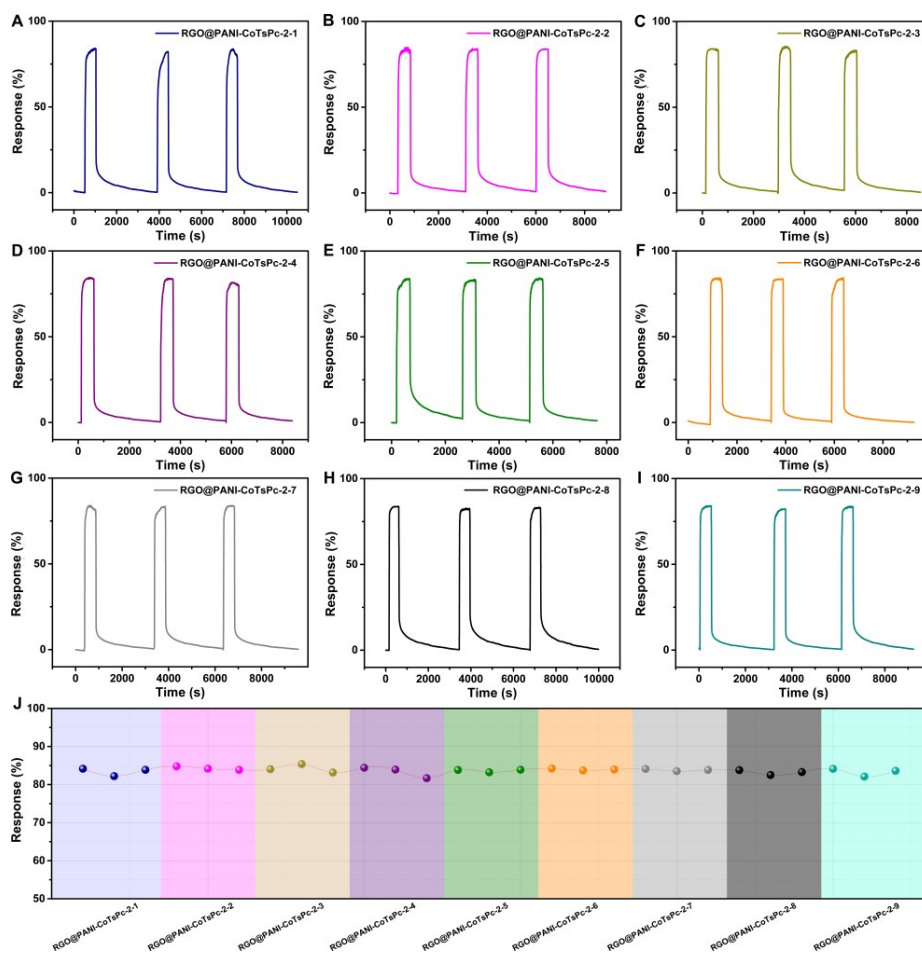

**Fig. S10** Dynamic response curve (A-I) and response value (J) of RGO@PANI-CoTsPc-2-1, RGO@PANI-CoTsPc-2-2, RGO@PANI-CoTsPc-2-3, RGO@PANI-CoTsPc-2-4, RGO@PANI-CoTsPc-2-5, RGO@PANI-CoTsPc-2-6, RGO@PANI-CoTsPc-2-7, RGO@PANI-CoTsPc-2-8 and RGO@PANI-CoTsPc-2-9 upon exposure to 5 ppm NH<sub>3</sub>.

As shown in **Fig. S10**, RGO@PANI-CoTsPc-2 was prepared nine times using the same procedure by different experimental personnel and the obtained products were labeled as RGO@PANI-CoTsPc-2-1, RGO@PANI-CoTsPc-2-2, RGO@PANI-CoTsPc-2-3, RGO@PANI-CoTsPc-2-4, RGO@PANI-CoTsPc-2-5, RGO@PANI-CoTsPc-2-6, RGO@PANI-CoTsPc-2-7, RGO@PANI-CoTsPc-2-8 and RGO@PANI-CoTsPc-2-9, respectively. Compared with RGO@PANI-CoTsPc-2, all samples exhibited similar dynamic response curve and response value to 5 ppm of NH<sub>3</sub>. This means that these products are basically the same, and the experiment can be easily reproduced by other researchers.

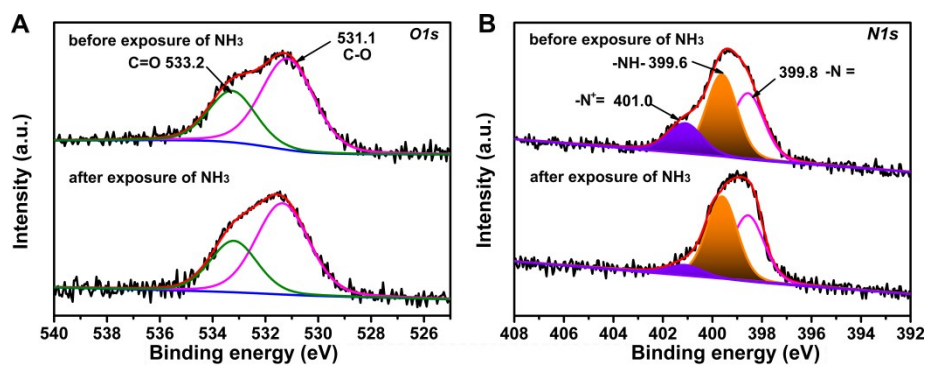

**Fig. S11** High-resolution O 1s (A) and N 1s (B) XPS spectra of RGO@PANI sensor (top) before (top) and after (bottom) the exposure of NH<sub>3</sub>.

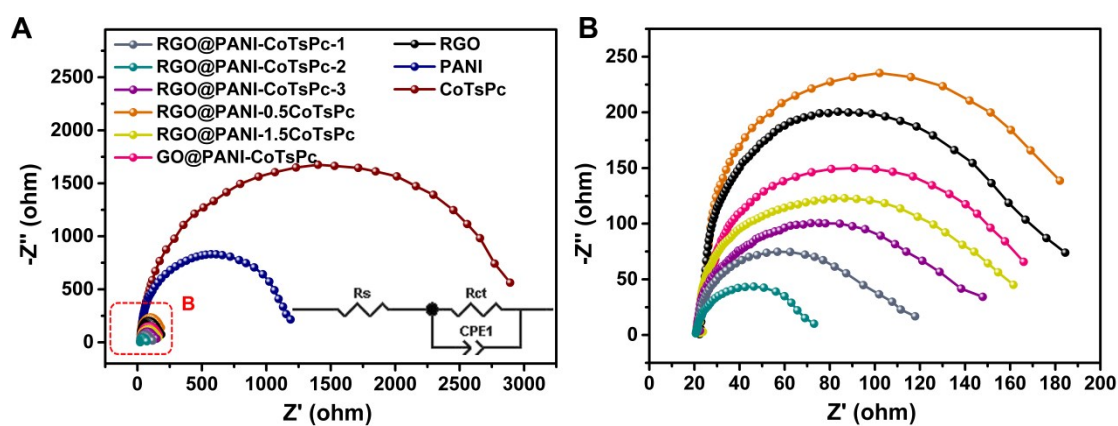

**Fig. S12** Nyquist plots (A-B) of various RGO@PANI-CoTsPc, GO@PANI-CoTsPc, RGO, PANI and CoTsPc, the inset in Fig. S12A is the equivalent circuit model applied to fit the Nyquist plots, where  $R_s$  is the electrolyte resistance,  $R_{ct}$  is the charge-transfer resistance and CPE1 represent the double layer capacitance.

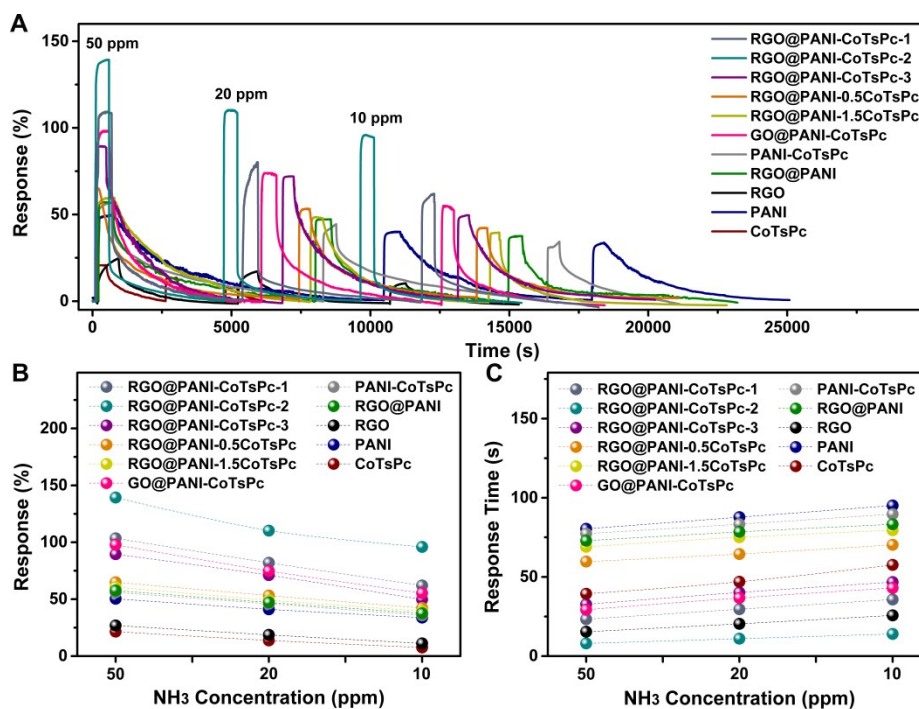

**Fig. S13** The dynamic responses (A), response (B) and response time (C) of various RGO@PANI-CoTsPc, GO@PANI-CoTsPc, PANI-CoTsPc, RGO@PANI, RGO, PANI and CoTsPc toward 50, 20 and 10 ppm of  $\text{NH}_3$  at room temperature.

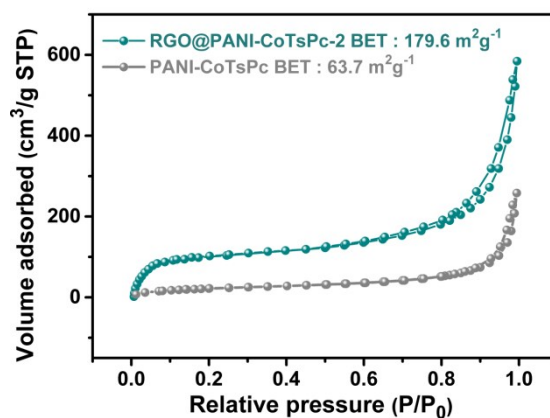

**Fig. S14**  $\text{N}_2$  adsorption-desorption isotherms of RGO@PANI-CoTsPc-2 and PANI-CoTsPc.

### 3. Supplementary Tables

**Table S1** The detailed dosages of GO, CoTsPc, An, APS and hydrazine hydrate in the process of synthesizing control sample.

| Sample name        | GO (mg) | CoTsPc (mg) | An ( $\mu$ L) | APS (g) | hydrazine hydrate (mL) |
|--------------------|---------|-------------|---------------|---------|------------------------|
| RGO                | 50      | 0           | 0             | 0       | 2                      |
| PANI               | 0       | 0           | 54            | 0.135   | 0                      |
| GO/CoTsPc          | 50      | 4           | 0             | 0       | 0                      |
| RGO/CoTsPc         | 50      | 4           | 0             | 0       | 2                      |
| RGO@PANI           | 50      | 0           | 54            | 0.135   | 2                      |
| PANI-CoTsPc        | 0       | 4           | 54            | 0.135   | 0                      |
| GO/CoTsPc/An       | 50      | 4           | 54            | 0       | 0                      |
| GO@PANI-CoTsPc     | 50      | 4           | 54            | 0.135   | 0                      |
| RGO@PANI-0.5CoTsPc | 50      | 2           | 54            | 0.135   | 2                      |
| RGO@PANI-1.5CoTsPc | 50      | 6           | 54            | 0.135   | 2                      |

**Table S2** The content of CoTsPc in RGO@PANI-CoTsPc obtained from ICP-OES analysis.

| Sensor material    | CoTsPc content (wt%) |
|--------------------|----------------------|
| RGO@PANI-CoTsPc-1  | 7.15                 |
| RGO@PANI-CoTsPc-2  | 7.28                 |
| RGO@PANI-CoTsPc-3  | 7.37                 |
| RGO@PANI-0.5CoTsPc | 3.79                 |
| RGO@PANI-1.5CoTsPc | 10.56                |

**Table S3** The amount of PANI in sensing materials obtained from TGA.

| Sensing material   | Weight loss from 300 to 600 °C (wt%) | PANI content (wt%) |
|--------------------|--------------------------------------|--------------------|
| RGO                | 2.68                                 | 0                  |
| CoTsPc             | 18.53                                | 0                  |
| PANI               | 27.37                                | 100.00             |
| RGO/CoTsPc         | 3.97                                 | 0                  |
| RGO@PANI-CoTsPc-1  | 7.41                                 | 12.57              |
| RGO@PANI-CoTsPc-2  | 13.15                                | 33.54              |
| RGO@PANI-CoTsPc-3  | 20.04                                | 58.71              |
| RGO@PANI-0.5CoTsPc | 11.68                                | 30.40              |
| RGO@PANI-1.5CoTsPc | 14.43                                | 35.92              |

**Table S4** The relationship of the response of RGO@PANI-CoTsPc-2 sensor to varying concentration of NH<sub>3</sub>.

| Sensing material  | The concentrations ranging of NH <sub>3</sub> is from 0.05 to 2 ppm | The concentrations ranging of NH <sub>3</sub> is from 5 to 200 ppm | Detection limit (S/N = 3) |
|-------------------|---------------------------------------------------------------------|--------------------------------------------------------------------|---------------------------|
| RGO@PANI-CoTsPc-2 | $y = 20.315x + 9.292$<br>$R^2 = 0.999$                              | $y = 1.121x + 83.135$<br>$R^2 = 0.998$                             | 14 ppb                    |



**Table S5** Room-temperature NH<sub>3</sub>-sensing properties of different sensors.

| Sensing material                                               | Response (%)<br>/Detection conc.<br>(ppm) <sup>[b]</sup> | Detection<br>limit<br>(ppm) <sup>[a]</sup> | Response time (s)<br>/Detectionv conc.<br>(ppm) <sup>[b]</sup> | Recovery time (s)<br>/Detection conc.<br>(ppm) <sup>[b]</sup> | Reference                                           |
|----------------------------------------------------------------|----------------------------------------------------------|--------------------------------------------|----------------------------------------------------------------|---------------------------------------------------------------|-----------------------------------------------------|
| <i>RGO@PANI-CoTsPc-2</i>                                       | 139.3/50                                                 | 0.014                                      | 8/50                                                           | 325/50                                                        | <i>This work</i>                                    |
| <i>CuPc@IRMOF</i>                                              | ~45/5                                                    | 0.052                                      | ---                                                            | ~1000/5                                                       | <i>Adv. Funct. Mater. 2020, 2005727.</i>            |
| <i>V-RGOH</i>                                                  | 10.1/20                                                  | 0.42                                       | 149/20                                                         | 284/20                                                        | <i>ACS Appl. Mater. Inter. 2020, 12, 20623.</i>     |
| <i>PPy@GO</i>                                                  | 42/10                                                    | ---                                        | 110/10                                                         | 650/10                                                        | <i>Adv. Funct. Mater. 2020, 30, 1909756.</i>        |
| <i>Ti<sub>3</sub>C<sub>2</sub>T<sub>x</sub> MXene/graphene</i> | 6.77/50                                                  | ---                                        | ~600/50                                                        | ~780/50                                                       | <i>ACS Appl. Mater. Inter. 2020, 12, 10434.</i>     |
| <i>PPy@rGO heterostructures</i>                                | 31/5                                                     | 0.041                                      | 85/5                                                           | 600/5                                                         | <i>ACS Appl. Mater. Interfaces 2020, 12, 38674.</i> |
| <i>LuPc<sub>2</sub>/Co(Cl<sub>8</sub>Pc)</i>                   | 13/10                                                    | 0.25                                       | ---                                                            | ---                                                           | <i>ACS Sens. 2020, 5, 1849.</i>                     |
| <i>PANI@SnO<sub>2</sub>/Zn<sub>2</sub>SnO<sub>4</sub></i>      | 20.4/100                                                 | 0.5                                        | 46/100                                                         | 54/100                                                        | <i>Sensor. Actuat. B-Chem. 2020,317, 128218.</i>    |
| <i>CsPbBr<sub>3</sub></i>                                      | ~0.1/50                                                  | 8.85                                       | 10/50                                                          | 30/50                                                         | <i>Small 2020, 16, 1904462.</i>                     |
| <i>TiO<sub>2</sub>-SnO<sub>2</sub>/MWCNTs</i>                  | ~0.91/50                                                 | 0.77                                       | 80/50                                                          | 15/80                                                         | <i>J. Mater. Chem. C, 2020, 8, 7567.</i>            |
| <i>PCVA Hydrogel</i>                                           | 31.6/40                                                  | ~0.14                                      | 46/40                                                          | 29/40                                                         | <i>ACS Sens. 2020, 5, 772.</i>                      |
| <i>ZnO/Au</i>                                                  | 3.59/1                                                   | <0.01                                      | ---                                                            | ---                                                           | <i>J. Hazard. Mater. 2020, 381, 120919.</i>         |
| <i>PPy/rGO</i>                                                 | 6.1/1                                                    | <1                                         | 60/1                                                           | 300/1                                                         | <i>Sensor. Actuat. B-Chem. 2020,305, 127423.</i>    |
| <i>PANI/polysiloxane</i>                                       | ~2.5/50                                                  | 5                                          | 208/50                                                         | 263/50                                                        | <i>Composites Part B 2020, 196, 108131.</i>         |



|                                                         |           |       |          |         |                                                     |
|---------------------------------------------------------|-----------|-------|----------|---------|-----------------------------------------------------|
| <b><i>C/rGO wrapped Co<sub>3</sub>O<sub>4</sub></i></b> | 123/50    | ---   | 20/50    | 300/50  | <i>J. Mater. Chem. A</i> , 2019, 7, 27522.          |
| <b><i>RGO/TiO<sub>2</sub>/Au</i></b>                    | 18.7/10   | ---   | ~100/10  | ---     | <i>Anal. Chem.</i> 2019, 91, 3311.                  |
| <b><i>Au-MoSe<sub>2</sub></i></b>                       | 2.6/20    | ---   | 18/20    | 16/20   | <i>Nano Energy</i> 2019,65, 103974.                 |
| <b><i>DPA-Ph-DBPzDCN</i></b>                            | 72.73/100 | 2     | 48/100   | 15/100  | <i>J. Mater. Chem. A</i> , 2019, 7, 4744.           |
| <b><i>GCS/PANI</i></b>                                  | 1.3/10    | ---   | 34/10    | 42/10   | <i>ACS Sens.</i> 2019, 4, 2343.                     |
| <b><i>CuSbS<sub>2</sub>/rGO</i></b>                     | 1.42/250  | 0.5   | 50/250   | 115/250 | <i>ACS Appl. Mater. Interfaces</i> 2019, 11, 9573.  |
| <b><i>Ti<sub>3</sub>C<sub>2</sub></i></b>               | 6.13/500  | ---   | 45/25    | 94/25   | <i>ACS Sens.</i> 2019, 4, 2763.                     |
| <b><i>NiPc-M MOFs</i></b>                               | 43/80     | 0.16  | ~1800/80 | ---     | <i>J. Am. Chem. Soc.</i> 2019, 141, 2046.           |
| <b><i>PANI/SWCNT</i></b>                                | 143/100   | ---   | 100/100  | 200/100 | <i>ACS Appl. Mater. Interfaces</i> 2019, 11, 38169. |
| <b><i>Q2D PANI</i></b>                                  | ~2.1/10   | 0.03  | ~672/10  | 900/10  | <i>Nat. Commun.</i> 2019, 10, 4225.                 |
| <b><i>PANI/WO<sub>3</sub></i></b>                       | ~7.5/100  | 0.5   | 13/10    | 49/10   | <i>Sensor. Actuat. B-Chem.</i> 2018, 259, 505.      |
| <b><i>SiO<sub>2</sub>CuMOF-GO-PANI</i></b>              | ~59.3/40  | 0.6   | 30/40    | 180/40  | <i>Anal. Chim. Acta</i> 2018, 1043, 89-97.          |
| <b><i>GO-PANI</i></b>                                   | 31.8/100  | 0.05  | 102/10   | 186/10  | <i>Sensor. Actuat. B-Chem.</i> 2018, 273, 726.      |
| <b><i>CFGO</i></b>                                      | 121/500   | 0.006 | 86/500   | 116/500 | <i>J. Mater. Chem. A</i> , 2017, 5, 19116.          |
| <b><i>Sulfonated RGO hydrogel</i></b>                   | 7.1/20    | 1.48  | 16/20    | 600/20  | <i>Adv. Sci.</i> 2017, 4, 1600319.                  |
| <b><i>PANI/MoS<sub>2</sub></i></b>                      | ~25/10    | 0.05  | ~170/10  | ---     | <i>Small</i> 2017, 13, 1701697.                     |
| <b><i>MCNT@1.0PANI</i></b>                              | 92.15/50  | 0.036 | 5/50     | 12/50   | <i>J. Mater. Chem. A</i> . 2017, 5, 24493.          |

|                             |           |      |           |            |                                                   |
|-----------------------------|-----------|------|-----------|------------|---------------------------------------------------|
| <b>SiO<sub>2</sub>@TRGO</b> | 6.5/50    | ---  | 250/50    | ---        | <i>Nanoscale</i> 2017, 9, 109.                    |
| <b>PANI/NiTsPc</b>          | 275/100   | ---  | 10/100    | 46/100     | <i>Sensor. Actuat. B-Chem.</i> 2016, 226, 553.    |
| <b>BPB/R-GO</b>             | 5.5/25    | 5    | 210/25    | ~3600/25   | <i>Adv. Funct. Mater.</i> 2016, 26, 4329.         |
| <b>Flexible PANI</b>        | 19.48/100 | ---  | 33/100    | 131/100    | <i>J. Mater. Chem. C</i> 2015, 3, 9461.           |
| <b>MWCNT/PANI</b>           | 15.5/2    | 2    | 6/2       | 35/2       | <i>Sensor. Actuat. B-Chem.</i> 2015, 221, 1523.   |
| <b>R-GO on 3D pillars</b>   | 88/40     | ~1.5 | 720/40    | ~4800/40   | <i>Adv. Funct. Mater.</i> , 2015, 25, 883-890.    |
| <b>Cu<sub>2</sub>O/rGO</b>  | 104/200   | ---  | 28/200    | 204/200    | <i>J. Mater. Chem. A</i> , 2015, 3, 1174.         |
| <b>HCSA doped PANI</b>      | ~46/700   | ---  | ~600/700  | ~600/700   | <i>Adv. Funct. Mater.</i> 2014, 24, 4005.         |
| <b>PANI@CNT</b>             | 7.3/2500  | 50   | 1200/2500 | ---        | <i>J. Mater. Chem. A</i> 2013, 1, 13321.          |
| <b>RGO</b>                  | 23/2800   | ---  | ~600/2800 | ~1200/2800 | <i>ACS Appl. Mater. Interfaces</i> 2013, 5, 7599. |
| <b>PANI/RGO</b>             | 59.2/50   | ---  | ~1080/50  | ---        | <i>J. Mater. Chem.</i> 2012, 22, 22488.           |

[a] If the sensor detection limit was not explicitly provided in the original report, then the lowest tested analyte concentration is listed.

[b] If the response (%), response time (s) or recovery time (s) of the sensor was not explicitly provided in the original report, then the estimate from the curve in that report is listed.

**Abbreviations:** RGO = Reduce graphene oxide; PANI= Polyaniline; Pc = phthalocyanine; IRMOF= isorecticular MOF; V-RGOH = vitamin C (VC)-modified reduced graphene hydrogel; PPy = Polypyrrole; GO = Graphene oxide; LuPc = lutetium phthalocyanine; PCVA = Polymer chains of poly(vinyl alcohol) (PVA) and carrageenan (CA); C = amorphous carbon; GCs = graphite capsules; DPA-Ph-DBPzDCN = 3,6-bis(4-(diphenylamino)phenyl)dibenzo[a,c]phenazine-11,12-dinitrile; M = Ni, Cu; SWCNT = single-walled carbon nanotube; Q2Ds = quasi-two-dimensional; MOF = metal-organic frameworks; CFGO = chemically fluorinated graphene oxide; MWCNT = Multi-walled carbon nanotube; BPB = bromophenol blue; HCSA = (+)-cam-phor-10-sulfonic acid; CNT = Carbon nanotube; SWNT = Single walled carbon nanotube.

**Table S6** Parameters obtained by fitting the Nyquist plots of various RGO@PANI-CoTsPc, GO@PANI-CoTsPc, RGO, PANI and CoTsPc using the equivalent circuit in *Fig. S12A*.

| <b>Samples</b>     | <b><math>R_s</math> (<math>\Omega</math>)</b> | <b><math>R_{ct}</math> (<math>\Omega</math>)</b> | <b>CPE1 (F)</b>       |
|--------------------|-----------------------------------------------|--------------------------------------------------|-----------------------|
| RGO@PANI-CoTsPc-1  | 21.10                                         | 85.49                                            | $3.96 \times 10^{-5}$ |
| RGO@PANI-CoTsPc-2  | 21.02                                         | 52.84                                            | $4.25 \times 10^{-5}$ |
| RGO@PANI-CoTsPc-3  | 21.14                                         | 117.26                                           | $3.67 \times 10^{-5}$ |
| RGO@PANI-0.5CoTsPc | 22.39                                         | 157.74                                           | $3.13 \times 10^{-5}$ |
| RGO@PANI-1.5CoTsPc | 21.28                                         | 127.73                                           | $3.54 \times 10^{-5}$ |
| GO@PANI-CoTsPc     | 21.44                                         | 134.11                                           | $3.38 \times 10^{-5}$ |
| RGO                | 21.83                                         | 144.98                                           | $3.29 \times 10^{-5}$ |
| PANI               | 22.78                                         | 1132.26                                          | $0.46 \times 10^{-5}$ |
| CoTsPc             | 22.95                                         | 2750.01                                          | $1.17 \times 10^{-4}$ |
